# Supplementary material
Source: publisher figshare collection journal article supplement (https://karger.figshare.com/ndownloader/files/12418655)
Supplement: Supplementary file 1 [file 12418655]

### Table S4: Canton of Zurich, Switzerland: Results of the final annual treatment participation model (c fixed to 0.04)

|  | Imputed dataset | |  |  | Complete dataset | |  |
| --- | --- | --- | --- | --- | --- | --- | --- |
|  | Estimate | SE | P |  | Estimate | SE | P |
| a | -0.556 | 0.043 | <.0001 |  | -0.634 | 0.048 | <.0001 |
| b | -0.007 | 0.043 | 0.8639 |  | 0.041 | 0.045 | 0.3618 |
| d | -0.591 | 0.022 | <.0001 |  | -0.545 | 0.022 | <.0001 |
| aNon-Swiss | 0.182 | 0.071 | 0.0102 |  | 0.227 | 0.074 | 0.0023 |
| aFemale | -0.228 | 0.069 | 0.001 |  | -0.222 | 0.072 | 0.0021 |
| dNon-Swiss | -0.306 | 0.040 | <.0001 |  | -0.280 | 0.039 | <.0001 |
| dFemale | -0.091 | 0.033 | 0.0055 |  | -0.082 | 0.033 | 0.0142 |
| dInject | -0.120 | 0.024 | <.0001 |  | -0.118 | 0.024 | <.0001 |
|  |  |  |  |  |  |  |  |
|  | RR | 95% CI- | 95% CI+ |  | RR | 95% CI- | 95% CI+ |
| dNon-Swiss | 0.737 | 0.681 | 0.797 |  | 0.756 | 0.699 | 0.816 |
| dFemale | 0.913 | 0.856 | 0.974 |  | 0.921 | 0.863 | 0.984 |
| dInject | 0.887 | 0.846 | 0.930 |  | 0.889 | 0.848 | 0.932 |
|  |  |  |  |  |  |  |  |
|  |  |  |  |  |  |  |  |
| -2 Log-Likelihood | | 233196 |  |  |  | 197308 |  |
| BIC | | 233270 |  |  |  | 197381 |  |
|  |  |  |  |  |  |  |  |
|  |  |  |  |  |  |  |  |
| Observations | | 191537 |  |  |  | 159945 |  |
| Patients |  | 11187 |  |  |  | 9385 |  |
| Max. observations per patient | | 23 |  |  |  | 23 |  |
|  |  |  |  |  |  |  |  |
| Period |  | 1992-2015 |  |  |  | 1992-2015 |  |
